# Supplementary material for: Comparison of the pharmacokinetics, safety and tolerability of daptomycin in healthy adult volunteers following intravenous administration by 30 min infusion or 2 min injection
Source: PubMed Central journal article supplement — J Antimicrob Chemother. 2009 Apr 22;64(1):151–8. doi: 10.1093/jac/dkp155 (PMC2692502; doi:10.1093/jac/dkp155), 2009-04-22

## Supplementary data

**Table S1.** Comparison (geometric mean ratio) of estimated pharmacokinetic parameters of daptomycin: day 1 versus day 7

|                | Mean ratio of day 1 versus day 7 (95% CI) |                    |
|----------------|-------------------------------------------|--------------------|
|                | daptomycin 4 mg/kg                        | daptomycin 6 mg/kg |
| $AUC_{0-\tau}$ | 1.21 (0.99–1.49)                          | 1.17 (1.06–1.28)   |
| CL             | 0.97 (0.79–1.2)                           | 0.99 (0.9–1.08)    |
| $C_{\max}$     | 1.1 (0.93–1.31)                           | 0.94 (0.81–1.1)    |
| $Ae_{0-\tau}$  | 1.26 (0.99–1.61)                          | 1.17 (0.91–1.49)   |

$Ae_{0-\tau}$ , cumulative amount of unchanged daptomycin excreted in urine;  $AUC_{0-\tau}$ , area under the plasma concentration–time curve from time zero to 24 h; CI, confidence interval.

**Table S2.** Model predicted population pharmacokinetic parameters of daptomycin following a single dose and multiple doses of the daptomycin 2 min iv injection or 30 min iv infusion

|                           | Population mean ( $\theta$ ) | Standard error of $\theta$ estimates | Inter-individual variability ( $\eta$ ), CV | Standard error of $\eta$ estimates |
|---------------------------|------------------------------|--------------------------------------|---------------------------------------------|------------------------------------|
| CL (L/min)                | 0.0110                       | 0.000301                             | 0.0196                                      | 0.00731                            |
| V1 (or $V_c$ ) (L)        | 4.79                         | 0.232                                | 0.0474                                      | 0.0154                             |
| Q (or $CL_d$ ) (L/min)    | 0.0428                       | 0.00516                              | NE                                          | NE                                 |
| V2 (or $V_t$ ) (L)        | 2.98                         | 0.133                                | 0.0162                                      | 0.0105                             |
| D1 (infusion) (min)       | 28.0                         | 0.648                                | NE                                          | NE                                 |
| D1 (injection) (min)      | 2.35                         | 0.175                                | NE                                          | NE                                 |
| Residual variability (CV) | 0.0175                       | 0.00288                              | NE                                          | NE                                 |

CV, coefficient of variance; D1 (infusion), model-estimated duration of zero-order input for 30 min iv infusion; D1 (injection), model-estimated duration of zero-order input for 2 min iv injection; NE, not estimated; V1 (or  $V_c$ ), volume of the central compartment; Q (or  $CL_d$ ), clearance between central and tissue compartments; V2 (or  $V_t$ ), peripheral volume of distribution of the tissue compartment.

An inter-occasion variance was included for CL ( $\eta=0.00253$ ) and variance ( $\eta$ ) of V1 for the injection regimen was 0.0612.

**Figure S1.** Diagnostic plots for the daptomycin population pharmacokinetic model.

Observed versus individual predicted daptomycin concentrations in plasma (left-hand panel), observed versus population predicted daptomycin concentrations in plasma (middle panel) and weighted residuals versus population predicted daptomycin concentrations in plasma (right-hand panel) are shown. Circles represent individual data points. Broken lines represent regression lines. Continuous lines represent unity.

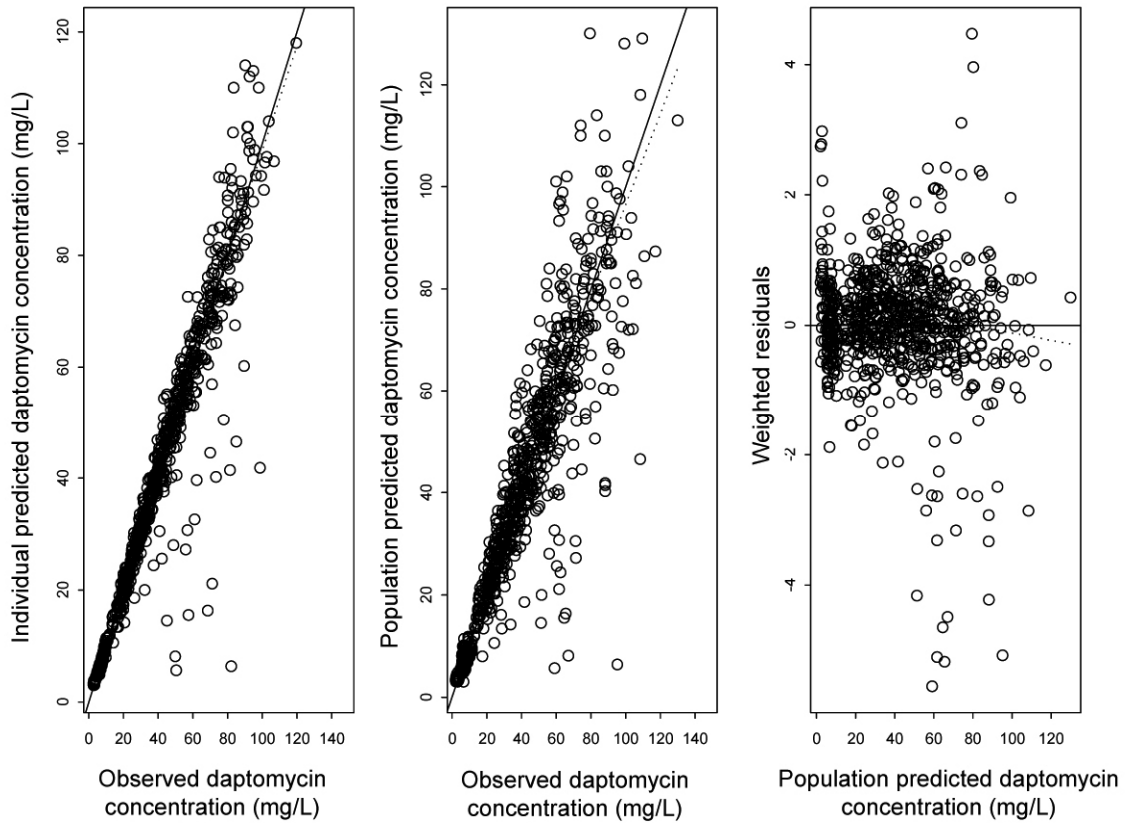

Supplement: dkp155_1.pdf [file dkp155_1.pdf]
